# Supplementary material for: Long-term outcomes of surgical reconstruction for post-tuberculosis tracheobronchial stenosis: a 7-year follow-up in a tuberculosis-endemic region
Source: PubMed Central journal article supplement — J Thorac Dis. 2024 Jun 14;16(6):3563–73. doi: 10.21037/jtd-24-230 (PMC11228715; doi:10.21037/jtd-24-230), 2024-06-14
Supplement: jtd-16-06-3563-supplementary.pdf [file jtd-16-06-3563-supplementary.pdf]

**Table S1** Factors associated with restenosis requiring interventions

| Characteristic                                               | No (N=43)    | Yes (N=5)  | P value |
|--------------------------------------------------------------|--------------|------------|---------|
| Age (years)                                                  | 30.3±8.8     | 33.2±18.2  | 0.97    |
| Female                                                       | 39 (90.7)    | 5 (100.0)  | >0.99   |
| TB status                                                    |              |            | 0.29    |
| Pulmonary TB                                                 | 41 (95.3)    | 4 (80.0)   |         |
| Bronchial TB                                                 | 2 (4.7)      | 1 (20.0)   |         |
| TB activity                                                  |              |            | 0.28    |
| Active TB                                                    | 8 (18.6)     | 2 (40.0)   |         |
| Past TB                                                      | 35 (81.4)    | 3 (60.0)   |         |
| Time from TB diagnosis to tracheobronchial stenosis (months) | 13 (8; 54)   | 9 (5; 120) | 0.99    |
| Symptoms                                                     |              |            | >0.99   |
| Asymptomatic                                                 | 1 (2.3)      | 0 (0.0)    |         |
| Local symptoms only                                          | 38 (88.4)    | 5 (100.0)  |         |
| Local and systemic symptoms                                  | 4 (9.3)      | 0 (0.0)    |         |
| Severity of dyspnea                                          |              |            | 0.09    |
| None                                                         | 27 (62.8)    | 1 (20.0)   |         |
| Mild                                                         | 12 (27.9)    | 4 (80.0)   |         |
| Moderate                                                     | 4 (9.3)      | 0 (0.0)    |         |
| Karnofsky performance status score                           |              |            | 0.28    |
| 90                                                           | 2 (4.7)      | 0 (0.0)    |         |
| 80                                                           | 14 (32.6)    | 2 (40.0)   |         |
| 70                                                           | 26 (60.5)    | 2 (40.0)   |         |
| 60                                                           | 1 (2.3)      | 1 (20.0)   |         |
| FVC (%)                                                      | 62.0±13.1    | 56.8±10.2  | 0.46    |
| FEV1 (%)                                                     | 54.6±11.8    | 53.0±10.3  | 0.81    |
| FEV1/FVC (%)                                                 | 77.2±14.8    | 79.6±16.1  | 0.72    |
| FEF 25–75 (%)                                                | 42.2±13.4    | 47.2±19.4  | 0.40    |
| PEF (%)                                                      | 56.9±14.5    | 56.0±19.2  | 0.89    |
| Restrictive lung disease                                     | 27/40 (67.5) | 4/5 (80.0) | >0.99   |
| Severity of restrictive disease                              | 27           | 4          | 0.58    |
| Mild                                                         | 8 (29.6)     | 2 (50.0)   |         |
| Moderate                                                     | 19 (70.4)    | 2 (50.0)   |         |
| Obstructive lung disease                                     | 11/40 (27.5) | 1/5 (20.0) | >0.99   |
| Severity of obstructive disease                              | 11           | 1          | 0.25    |
| Mild                                                         | 4 (36.4)     | 0 (0.0)    |         |
| Moderate                                                     | 5 (45.5)     | 0 (0.0)    |         |
| Severe                                                       | 2 (18.2)     | 1 (100.0)  |         |
| Airway stenosis                                              | 43 (100.0)   | 5 (100.0)  |         |
| Location of stenosis                                         |              |            | 0.47    |
| Trachea                                                      | 3 (7.0)      | 0 (0.0)    |         |
| Left main bronchus                                           | 33 (76.7)    | 3 (60.0)   |         |
| Right main bronchus                                          | 7 (16.3)     | 2 (40.0)   |         |
| Location of the lesion in the bronchus                       | 40           | 5          | 0.59    |
| Proximal bronchus                                            | 4 (10.0)     | 0 (0.0)    |         |
| Middle bronchus                                              | 9 (22.5)     | 0 (0.0)    |         |
| Distal bronchus                                              | 4 (10.0)     | 1 (20.0)   |         |
| Entire bronchus                                              | 23 (57.5)    | 4 (80.0)   |         |
| Length of stenosis (mm)                                      | 25.5±8.8     | 27.5±6.3   | 0.46    |
| Classification of stenosis                                   |              |            | 0.53    |
| Moderate stenosis (51–70%)                                   | 5 (11.6)     | 1 (20.0)   |         |
| Severe stenosis (71–99%)                                     | 20 (46.5)    | 3 (60.0)   |         |
| Occlusion (no lumen)                                         | 18 (41.9)    | 1 (20.0)   |         |
| Collapse                                                     | 36 (83.7)    | 3 (60.0)   | 0.23    |
| Consolidation                                                | 14 (32.6)    | 2 (40.0)   | >0.99   |
| Linear fibrosis                                              | 6 (14.0)     | 1 (20.0)   | 0.56    |
| Surgical approach                                            |              |            | >0.99   |
| Resection and anastomosis                                    | 19 (44.2)    | 2 (40.0)   |         |
| Resection and anastomosis plus lobectomy                     | 24 (55.8)    | 3 (60.0)   |         |
| Method of anastomosis                                        |              |            | 0.58    |
| End-to-end anastomosis of trachea                            | 3 (7.0)      | 0 (0.0)    |         |
| End-to-end anastomosis of main bronchus                      | 7 (16.3)     | 1 (20.0)   |         |
| Anastomosis of main bronchus to carina                       | 8 (18.6)     | 0 (0.0)    |         |
| Anastomosis of main bronchus to trachea                      | 1 (2.3)      | 1 (20.0)   |         |
| Anastomosis of lobe bronchus to main bronchus                | 9 (20.9)     | 1 (20.0)   |         |
| Anastomosis of lobe bronchus to carina                       | 14 (32.6)    | 2 (40.0)   |         |
| Anastomosis of lobe bronchus to trachea                      | 1 (2.3)      | 0 (0.0)    |         |
| Mobilization of the trachea                                  | 5 (11.6)     | 0 (0.0)    | >0.99   |
| Mobilization of the hilum                                    | 40 (93.0)    | 5 (100.0)  | >0.99   |

Statistics are presented as mean ± standard deviation and n (%). TB, tuberculosis; FVC, forced vital capacity; FEV1, forced expiratory volume in 1 second; FEF 25–75, forced expiratory flow between 25% and 75% of vital capacity; PEF, peak expiratory flow.
